# Supplementary material
Source: PubMed Central journal article supplement (PMC2916715)
Supplement: btq319_1.pdf [file btq319_1.pdf]

## 1 Supplementary Material

While the averaged performance of all methods (structure kernel, FEATURE, GBT) was similar irrespective of the evaluation procedure, we observed that the accuracy was unequal with respect to particular families, superfamilies, and folds (the imbalance was significantly less pronounced with folds). Good classification accuracy of the structure kernel was observed on the following groups: (families) cystathionine synthase-like, arylsulfatase, beta-glycanases, amidinotransferase, and NagB/RpiA/CoA transferase-like; (superfamilies) PLP-dependent transferases, alkaline phosphatase-like, phosphoenolpyruvate/pyruvate domain, pentein, and glutathione synthetase ATP-binding domain-like; (folds) PLP-dependent transferase-like, alkaline phosphatase-like, ATP-grasp, pentein, beta/alpha-propeller and beta-lactamase/transpeptidase-like. Similarly, poor classification accuracy was observed on the following groups: (families) cytochrome c oxidase subunit I-like, phosphoribosyltransferases (PRTases), dUTPase-like, microbial transglutaminase, and LexA-related; (superfamilies) cytochrome c oxidase subunit I-like, metallo-dependent phosphatases, dehydroquinase synthase-like, thiamin diphosphate-binding fold, and LexA/Signal peptidase; (folds) cytochrome c oxidase subunit I-like, metallo-dependent phosphatases, HAD-like, L-aspartase-like and thiamin diphosphate-binding fold. More details about these groups can be found in Supplementary Table 1.

| Families      | ID     | Name                                           | #Sites | <i>AUC</i> |
|---------------|--------|------------------------------------------------|--------|------------|
| Good          | 53402  | Cystathionine synthase-like                    | 125    | 99.1       |
|               | 53653  | Arylsulfatase                                  | 96     | 97.9       |
|               | 51487  | beta-glycanases                                | 93     | 97.4       |
|               | 55914  | Amidino-transferase                            | 68     | 98.1       |
|               | 100950 | NagB/RpiA/CoA transferase-like                 | 61     | 99.7       |
| Poor          | 81441  | Cytochrome c oxidase subunit I-like            | 160    | 71.7       |
|               | 53272  | Phosphoribosyltransferases                     | 47     | 67.7       |
|               | 51284  | dUTPase-like                                   | 40     | 65.9       |
|               | 75336  | Microbial transglutaminase                     | 30     | 60.3       |
|               | 51307  | LexA-related                                   | 26     | 60.4       |
| Superfamilies | ID     | Name                                           | #Sites | <i>AUC</i> |
| Good          | 53383  | PLP-dependent transferases                     | 255    | 97.6       |
|               | 53649  | Alkaline phosphatase-like                      | 101    | 97.1       |
|               | 51621  | Phosphoenolpyruvate/pyruvate domain            | 81     | 99.4       |
|               | 55909  | Pentain                                        | 68     | 98.0       |
|               | 56059  | Glutathione synthetase ATP-binding domain-like | 38     | 97.8       |
| Poor          | 81442  | Cytochrome c oxidase subunit I-like            | 160    | 58.2       |
|               | 56300  | Metallo-dependent phosphatases                 | 60     | 77.9       |
|               | 56796  | Dehydroquinase synthase-like                   | 54     | 76.0       |
|               | 52518  | Thiamin diphosphate-binding fold               | 37     | 72.0       |
|               | 51306  | LexA/Signal peptidase                          | 26     | 59.9       |
| Folds         | ID     | Name                                           | #Sites | <i>AUC</i> |
| Good          | 53382  | PLP-dependent transferase-like                 | 255    | 97.6       |
|               | 53648  | Alkaline phosphatase-like                      | 101    | 97.3       |
|               | 56058  | ATP-grasp                                      | 89     | 96.7       |
|               | 55908  | Pentain, beta/alpha-propeller                  | 68     | 97.9       |
|               | 56600  | beta-lactamase/transpeptidase-like             | 43     | 98.3       |
| Poor          | 81443  | Cytochrome c oxidase subunit I-like            | 160    | 71.2       |
|               | 56299  | Metallo-dependent phosphatases                 | 80     | 76.7       |
|               | 56783  | HAD-like                                       | 67     | 79.4       |
|               | 48556  | L-aspartase-like                               | 56     | 66.8       |
|               | 52517  | Thiamin diphosphate-binding fold               | 37     | 73.2       |

Table 1: The protein families/superfamilies/folds with which Structure Kernel performs well and poorly
